# Supplementary material
Source: PubMed Central journal article supplement (PMC3322427)
Supplement: NIHMS365524-supplement-1.pdf [file NIHMS365524-supplement-1.pdf]

## Supplementary Materials

*Chen et al*

**Supplementary Table 1:**  
RT-qPCR: primers and probes for selected transcripts.

| RefSeq transcript ID | Gene symbol | Primer Sequence                                      | Probe     | Amplicon position |
|----------------------|-------------|------------------------------------------------------|-----------|-------------------|
| NM_004655            | AXIN        | gctgctgggtctccctacaact<br>ggaccacagccattcaggaacta    | ctgccccca | 3735--3804        |
| NM_014141            | CNTNAP2     | gcctacttgagaggaactccata<br>gcaccattccaagtctcagtaat   | tggtgtg   | 9490--9575        |
| NM_001904            | CTNNB1      | ccactcccaccctaccaaccaa<br>gaagtttaaaaagccagtttgggta  | ctctgct   | 2631--2715        |
| NM_012242            | DKK1        | gcagcacatagcgtgacgcatg<br>ggacgcaggcgtgcaaatctgt     | gcaggaag  | 461--538          |
| NM_139072            | DNER        | ctccgccatgtgcccgactt<br>cgcatggtgggtgggagcaaa        | ccacctcc  | 1961--2034        |
| NM_032048            | EMILIN2     | gccacagtgtgacctgcagt<br>ggaggcaggggagagccggt         | ggtggctg  | 3658--3715        |
| NM_001453            | FOXC1       | gctccggacgtgcggtacaga<br>gtgaacgggaatagtagctgtcaa    | ctccagc   | 1567--1634        |
| NM_000905            | NPY         | ggaaaaggccagagagcaagtct<br>gtcccagaactcggctgaaga     | tggtgatg  | 342--412          |
| NM_181876            | PPP2R2C     | gaacgccgtacattcgagagta<br>ggaaggaccagtgaatagtcaca    | tggtctg   | 3731--3817        |
| NM_002737            | PRKCA       | aaagcaatgcagtaattcacatcc<br>gccattcaaccgtcaaacaccatt | cagaggag  | 8591--8661        |
| NM_002942            | ROBO2       | agcttgcatagcaatgcacaaaaga<br>caaaactcgcctacaggaagaaa | ctcctctg  | 5018--5089        |
| NM_194435            | VIP         | atgttgcgatcatttccctcaagaa<br>agaccttgagcaaagctgatga  | ttcccagt  | 689--753          |

**Supplementary Table 2:** A vs. B comparison identifying 132 transcripts differentially expressed between A and B groups on the univariate test ( $p < 0.001$ ). Sorted by  $p$ -value of the univariate test.

| RefSeq transcript ID      | Gene symbol              | Entrez Gene name                                                                                                   | Fold-change | Parametric p-value |
|---------------------------|--------------------------|--------------------------------------------------------------------------------------------------------------------|-------------|--------------------|
| <a href="#">NM_194435</a> | <a href="#">VIP</a>      | Homo sapiens vasoactive intestinal peptide (VIP), transcript variant 2, mRNA.                                      | -19.17      | < 1e-07            |
| <a href="#">NM_144594</a> | <a href="#">GTSF1</a>    | Homo sapiens gametocyte specific factor 1 (GTSF1), mRNA.                                                           | 15.14       | < 1e-07            |
| <a href="#">NM_014141</a> | <a href="#">CNTNAP2</a>  | Homo sapiens contactin associated protein-like 2 (CNTNAP2), mRNA.                                                  | 13.44       | < 1e-07            |
| <a href="#">NM_012242</a> | <a href="#">DKK1</a>     | Homo sapiens dickkopf homolog 1 (Xenopus laevis) (DKK1), mRNA.                                                     | -14.76      | < 1e-07            |
| <a href="#">NM_024019</a> | <a href="#">NEUROG2</a>  | Homo sapiens neurogenin 2 (NEUROG2), mRNA.                                                                         | -18.39      | < 1e-07            |
| <a href="#">NM_020822</a> | <a href="#">KCNT1</a>    | Homo sapiens potassium channel, subfamily T, member 1 (KCNT1), mRNA.                                               | 11.38       | < 1e-07            |
| <a href="#">NM_004617</a> | <a href="#">TM4SF4</a>   | Homo sapiens transmembrane 4 L six family member 4 (TM4SF4), mRNA.                                                 | -8.39       | < 1e-07            |
| <a href="#">NM_000624</a> | <a href="#">SERPINA5</a> | Homo sapiens serpin peptidase inhibitor, clade A (alpha-1 antiproteinase, antitrypsin), member 5 (SERPINA5), mRNA. | 9.89        | < 1e-07            |
| <a href="#">NM_021048</a> | <a href="#">MAGEA10</a>  | Homo sapiens melanoma antigen family A, 10 (MAGEA10), transcript variant 2, mRNA.                                  | 16.37       | < 1e-07            |
| <a href="#">NM_003598</a> | <a href="#">TEAD2</a>    | Homo sapiens TEA domain family member 2 (TEAD2), mRNA.                                                             | -9.64       | < 1e-07            |
| <a href="#">NM_080390</a> | <a href="#">TCEAL2</a>   | Homo sapiens transcription elongation factor A (SII)-like 2 (TCEAL2), mRNA.                                        | 7.28        | < 1e-07            |
| <a href="#">NM_000905</a> | <a href="#">NPY</a>      | Homo sapiens neuropeptide Y (NPY), mRNA.                                                                           | 9.93        | < 1e-07            |
| <a href="#">NM_033258</a> | <a href="#">GNG8</a>     | Homo sapiens guanine nucleotide binding protein (G protein), gamma 8 (GNG8), mRNA.                                 | -7.66       | < 1e-07            |
| <a href="#">NM_005519</a> | <a href="#">HMX2</a>     | Homo sapiens H6 family homeobox 2 (HMX2), mRNA.                                                                    | -5.65       | < 1e-07            |
| <a href="#">NM_057159</a> | <a href="#">LPAR1</a>    | Homo sapiens lysophosphatidic acid receptor 1 (LPAR1), transcript variant 2, mRNA.                                 | -4.83       | < 1e-07            |
| <a href="#">NM_018354</a> | <a href="#">C20orf46</a> | Homo sapiens chromosome 20 open reading frame 46 (C20orf46), mRNA.                                                 | 6.42        | < 1e-07            |
| <a href="#">NM_004192</a> | <a href="#">ASMTL</a>    | Homo sapiens acetylserotonin O-methyltransferase-like (ASMTL), mRNA.                                               | 5.36        | < 1e-07            |

|                              |                          |                                                                                                                              |       |         |
|------------------------------|--------------------------|------------------------------------------------------------------------------------------------------------------------------|-------|---------|
| <a href="#">NM_013364</a>    | <a href="#">PNMA3</a>    | Homo sapiens paraneoplastic antigen MA3 (PNMA3), mRNA.                                                                       | 5.68  | < 1e-07 |
| <a href="#">NM_020826</a>    | <a href="#">SYT13</a>    | Homo sapiens synaptotagmin XIII (SYT13), mRNA.                                                                               | 5.05  | < 1e-07 |
| <a href="#">NM_080760</a>    | <a href="#">DACH1</a>    | Homo sapiens dachshund homolog 1 (Drosophila) (DACH1), transcript variant 2, mRNA.                                           | -6.57 | < 1e-07 |
| <a href="#">NM_207334</a>    | <a href="#">FAM43B</a>   | Homo sapiens family with sequence similarity 43, member B (FAM43B), mRNA.                                                    | 4.99  | < 1e-07 |
| <a href="#">NM_005386</a>    | <a href="#">NNAT</a>     | Homo sapiens neuronatin (NNAT), transcript variant 1, mRNA.                                                                  | -6.20 | < 1e-07 |
| <a href="#">NM_181876</a>    | <a href="#">PPP2R2C</a>  | Homo sapiens protein phosphatase 2 (formerly 2A), regulatory subunit B, gamma isoform (PPP2R2C), transcript variant 2, mRNA. | 5.33  | < 1e-07 |
| <a href="#">NM_001013653</a> | <a href="#">LRRC26</a>   | Homo sapiens leucine rich repeat containing 26 (LRRC26), mRNA.                                                               | 5.94  | < 1e-07 |
| <a href="#">NM_012202</a>    | <a href="#">GNG3</a>     | Homo sapiens guanine nucleotide binding protein (G protein), gamma 3 (GNG3), mRNA.                                           | 8.29  | < 1e-07 |
| <a href="#">NM_004192</a>    | <a href="#">ASMTL</a>    | Homo sapiens acetylserotonin O-methyltransferase-like (ASMTL), mRNA.                                                         | 4.65  | < 1e-07 |
| <a href="#">NM_013322</a>    | <a href="#">SNX10</a>    | Homo sapiens sorting nexin 10 (SNX10), mRNA.                                                                                 | 4.50  | < 1e-07 |
| <a href="#">NM_020775</a>    | <a href="#">KIAA1324</a> | Homo sapiens KIAA1324 (KIAA1324), mRNA.                                                                                      | 4.04  | < 1e-07 |
| <a href="#">NM_152780</a>    | <a href="#">MAP7D2</a>   | Homo sapiens MAP7 domain containing 2 (MAP7D2), mRNA.                                                                        | 4.19  | < 1e-07 |
| <a href="#">NM_001039582</a> | <a href="#">PNCK</a>     | Homo sapiens pregnancy upregulated non-ubiquitously expressed CaM kinase (PNCK), mRNA.                                       | 4.46  | < 1e-07 |
| <a href="#">NM_133505</a>    | <a href="#">DCN</a>      | Homo sapiens decorin (DCN), transcript variant C, mRNA.                                                                      | -4.18 | < 1e-07 |
| <a href="#">NM_001290</a>    | <a href="#">LDB2</a>     | Homo sapiens LIM domain binding 2 (LDB2), mRNA.                                                                              | 4.39  | < 1e-07 |
| <a href="#">NM_001001391</a> | <a href="#">CD44</a>     | Homo sapiens CD44 molecule (Indian blood group) (CD44), transcript variant 4, mRNA.                                          | -3.56 | < 1e-07 |
| <a href="#">NM_007374</a>    | <a href="#">SIX6</a>     | Homo sapiens SIX homeobox 6 (SIX6), mRNA.                                                                                    | 5.08  | < 1e-07 |
| <a href="#">NM_181676</a>    | <a href="#">PPP2R2B</a>  | Homo sapiens protein phosphatase 2 (formerly 2A), regulatory subunit B, beta isoform (PPP2R2B), transcript variant 4, mRNA.  | 3.65  | < 1e-07 |
| <a href="#">NM_001099660</a> | <a href="#">LRRN3</a>    | Homo sapiens leucine rich repeat neuronal 3 (LRRN3), transcript variant 1, mRNA.                                             | -3.35 | < 1e-07 |
| <a href="#">NM_000598</a>    | <a href="#">IGFBP3</a>   | Homo sapiens insulin-like growth factor binding protein 3 (IGFBP3), transcript variant 2, mRNA.                              | -4.38 | < 1e-07 |

|                           |                           |                                                                                                                     |       |         |
|---------------------------|---------------------------|---------------------------------------------------------------------------------------------------------------------|-------|---------|
| <a href="#">AB073882</a>  | <a href="#">Hs.1832</a>   | Homo sapiens primary neuroblastoma cDNA, clone:Nbla00830, full insert sequence                                      | 3.89  | < 1e-07 |
| <a href="#">NM_007115</a> | <a href="#">TNFAIP6</a>   | Homo sapiens tumor necrosis factor, alpha-induced protein 6 (TNFAIP6), mRNA.                                        | -3.74 | < 1e-07 |
| <a href="#">NM_014550</a> | <a href="#">CARD10</a>    | Homo sapiens caspase recruitment domain family, member 10 (CARD10), mRNA.                                           | 2.97  | < 1e-07 |
| <a href="#">NM_181689</a> | <a href="#">NNAT</a>      | Homo sapiens neuronatin (NNAT), transcript variant 2, mRNA.                                                         | -5.74 | < 1e-07 |
| <a href="#">AK095715</a>  | <a href="#">Hs.155736</a> | Homo sapiens cDNA FLJ38396 fis, clone FEBRA2007957                                                                  | -3.75 | < 1e-07 |
| <a href="#">NM_003020</a> | <a href="#">SCG5</a>      | Homo sapiens secretogranin V (7B2 protein) (SCG5), mRNA.                                                            | 3.09  | < 1e-07 |
| <a href="#">NM_001453</a> | <a href="#">FOXC1</a>     | Homo sapiens forkhead box C1 (FOXC1), mRNA.                                                                         | -4.76 | < 1e-07 |
| <a href="#">NR_002784</a> | <a href="#">SMEK3P</a>    | Homo sapiens SMEK homolog 3, suppressor of mek1 (Dictyostelium) pseudogene (SMEK3P) on chromosome X.                | 3.89  | < 1e-07 |
| <a href="#">NM_201630</a> | <a href="#">LRRN2</a>     | Homo sapiens leucine rich repeat neuronal 2 (LRRN2), transcript variant 2, mRNA.                                    | 4.13  | < 1e-07 |
| <a href="#">NM_001430</a> | <a href="#">EPAS1</a>     | Homo sapiens endothelial PAS domain protein 1 (EPAS1), mRNA.                                                        | -4.98 | < 1e-07 |
| <a href="#">CN304251</a>  | <a href="#">Hs.436189</a> | 17000532640995 GRN_ES Homo sapiens cDNA 5, mRNA sequence                                                            | 4.88  | < 1e-07 |
| <a href="#">NM_139072</a> | <a href="#">DNER</a>      | Homo sapiens delta/notch-like EGF repeat containing (DNER), mRNA.                                                   | 3.87  | < 1e-07 |
| <a href="#">NM_152330</a> | <a href="#">FRMD6</a>     | Homo sapiens FERM domain containing 6 (FRMD6), transcript variant 2, mRNA.                                          | -3.29 | < 1e-07 |
| <a href="#">NM_172081</a> | <a href="#">CAMK2B</a>    | Homo sapiens calcium/calmodulin-dependent protein kinase (CaM kinase) II beta (CAMK2B), transcript variant 5, mRNA. | 3.52  | < 1e-07 |
| <a href="#">NM_032048</a> | <a href="#">EMILIN2</a>   | Homo sapiens elastin microfibril interfacer 2 (EMILIN2), mRNA.                                                      | 3.65  | < 1e-07 |
| <a href="#">NM_080415</a> | <a href="#">4-Sep</a>     | Homo sapiens septin 4 (SEPT4), transcript variant 2, mRNA.                                                          | 3.62  | < 1e-07 |
| <a href="#">NM_174947</a> | <a href="#">C19orf30</a>  | Homo sapiens chromosome 19 open reading frame 30 (C19orf30), mRNA.                                                  | 2.79  | < 1e-07 |
| <a href="#">NM_177526</a> | <a href="#">PPAP2C</a>    | Homo sapiens phosphatidic acid phosphatase type 2C (PPAP2C), transcript variant 2, mRNA.                            | 3.08  | < 1e-07 |
| <a href="#">NM_020223</a> | <a href="#">FAM20C</a>    | Homo sapiens family with sequence similarity 20, member C (FAM20C), mRNA.                                           | 2.99  | < 1e-07 |
| <a href="#">CD678339</a>  | <a href="#">Hs.489857</a> | hp06b06.y1 Human Trabecular meshwork cDNA: hohphq Homo sapiens cDNA clone hp06b06 5, mRNA sequence                  | -2.56 | < 1e-07 |

|                     |                 |                                                                                                                    |       |         |
|---------------------|-----------------|--------------------------------------------------------------------------------------------------------------------|-------|---------|
| <u>NM_020975</u>    | <u>RET</u>      | Homo sapiens ret proto-oncogene (RET), transcript variant 2, mRNA.                                                 | -2.86 | < 1e-07 |
| <u>XM_001133042</u> | <u>PDZRN3</u>   | PREDICTED: Homo sapiens PDZ domain containing RING finger 3 (PDZRN3), mRNA.                                        | -5.28 | < 1e-07 |
| <u>NM_012155</u>    | <u>EML2</u>     | Homo sapiens echinoderm microtubule associated protein like 2 (EML2), mRNA.                                        | 3.41  | < 1e-07 |
| <u>NM_002345</u>    | <u>LUM</u>      | Homo sapiens lumican (LUM), mRNA.                                                                                  | -2.94 | < 1e-07 |
| <u>NM_021170</u>    | <u>HES4</u>     | Homo sapiens hairy and enhancer of split 4 (Drosophila) (HES4), mRNA.                                              | 3.76  | < 1e-07 |
| <u>XM_001133042</u> | <u>PDZRN3</u>   | PREDICTED: Homo sapiens PDZ domain containing RING finger 3 (PDZRN3), mRNA.                                        | -5.69 | < 1e-07 |
| <u>NM_032229</u>    | <u>SLITRK6</u>  | Homo sapiens SLIT and NTRK-like family, member 6 (SLITRK6), mRNA.                                                  | -3.40 | < 1e-07 |
| <u>NM_002942</u>    | <u>ROBO2</u>    | Homo sapiens roundabout, axon guidance receptor, homolog 2 (Drosophila) (ROBO2), mRNA.                             | -4.66 | < 1e-07 |
| <u>BX537518</u>     | <u>Hs.7023</u>  | Homo sapiens mRNA; cDNA DKFZp686N1989 (from clone DKFZp686N1989)                                                   | 3.05  | < 1e-07 |
| <u>NM_032594</u>    | <u>INSM2</u>    | Homo sapiens insulinoma-associated 2 (INSM2), mRNA.                                                                | -3.66 | < 1e-07 |
| <u>NM_000316</u>    | <u>PTH1R</u>    | Homo sapiens parathyroid hormone receptor 1 (PTH1R), mRNA.                                                         | 3.19  | < 1e-07 |
| <u>BX100246</u>     | <u>Hs.38132</u> | BX100246 Soares fetal liver spleen 1NFLS Homo sapiens cDNA clone IMAGp998N04398, mRNA sequence                     | -2.70 | < 1e-07 |
| <u>NM_017637</u>    | <u>BNC2</u>     | Homo sapiens basonuclein 2 (BNC2), mRNA.                                                                           | -2.86 | < 1e-07 |
| <u>NM_145764</u>    | <u>MGST1</u>    | Homo sapiens microsomal glutathione S-transferase 1 (MGST1), transcript variant 1d, mRNA.                          | 2.83  | < 1e-07 |
| <u>NM_002872</u>    | <u>RAC2</u>     | Homo sapiens ras-related C3 botulinum toxin substrate 2 (rho family, small GTP binding protein Rac2) (RAC2), mRNA. | 2.83  | < 1e-07 |
| <u>NM_003283</u>    | <u>TNNT1</u>    | Homo sapiens troponin T type 1 (skeletal, slow) (TNNT1), mRNA.                                                     | 3.62  | < 1e-07 |
| <u>NM_004100</u>    | <u>EYA4</u>     | Homo sapiens eyes absent homolog 4 (Drosophila) (EYA4), transcript variant 1, mRNA.                                | -3.26 | < 1e-07 |
| <u>NM_018962</u>    | <u>DSCR6</u>    | Homo sapiens Down syndrome critical region gene 6 (DSCR6), mRNA.                                                   | 3.51  | < 1e-07 |
| <u>NM_194439</u>    | <u>RNF212</u>   | Homo sapiens ring finger protein 212 (RNF212), mRNA.                                                               | 3.33  | < 1e-07 |
| <u>NM_032808</u>    | <u>LINGO1</u>   | Homo sapiens leucine rich repeat and Ig domain containing 1 (LINGO1), mRNA.                                        | 2.99  | < 1e-07 |
| <u>NM_174941</u>    | <u>CD163L1</u>  | Homo sapiens CD163 molecule-like 1 (CD163L1), mRNA.                                                                | 3.10  | < 1e-07 |

|                              |                           |                                                                                                                                                |       |         |
|------------------------------|---------------------------|------------------------------------------------------------------------------------------------------------------------------------------------|-------|---------|
| <a href="#">NM_015557</a>    | <a href="#">CHD5</a>      | Homo sapiens chromodomain helicase DNA binding protein 5 (CHD5), mRNA.                                                                         | 3.33  | < 1e-07 |
| <a href="#">NM_173662</a>    | <a href="#">RNF175</a>    | Homo sapiens ring finger protein 175 (RNF175), mRNA.                                                                                           | 4.03  | < 1e-07 |
| <a href="#">NM_000419</a>    | <a href="#">ITGA2B</a>    | Homo sapiens integrin, alpha 2b (platelet glycoprotein IIb of IIb/IIIa complex, antigen CD41) (ITGA2B), mRNA.                                  | 2.75  | < 1e-07 |
| <a href="#">NM_182801</a>    | <a href="#">EGFLAM</a>    | Homo sapiens EGF-like, fibronectin type III and laminin G domains (EGFLAM), transcript variant 4, mRNA.                                        | 2.39  | < 1e-07 |
| <a href="#">NM_033504</a>    | <a href="#">TMEM54</a>    | Homo sapiens transmembrane protein 54 (TMEM54), mRNA.                                                                                          | 2.90  | < 1e-07 |
| <a href="#">NM_004431</a>    | <a href="#">EPHA2</a>     | Homo sapiens EPH receptor A2 (EPHA2), mRNA.                                                                                                    | 3.09  | < 1e-07 |
| <a href="#">NM_020630</a>    | <a href="#">RET</a>       | Homo sapiens ret proto-oncogene (RET), transcript variant 4, mRNA.                                                                             | -2.69 | < 1e-07 |
| <a href="#">NM_001946</a>    | <a href="#">DUSP6</a>     | Homo sapiens dual specificity phosphatase 6 (DUSP6), transcript variant 1, mRNA.                                                               | -2.51 | < 1e-07 |
| <a href="#">NM_000728</a>    | <a href="#">CALCB</a>     | Homo sapiens calcitonin-related polypeptide beta (CALCB), mRNA.                                                                                | 2.49  | < 1e-07 |
| <a href="#">NM_014817</a>    | <a href="#">KIAA0644</a>  | Homo sapiens KIAA0644 gene product (KIAA0644), mRNA.                                                                                           | -3.33 | < 1e-07 |
| <a href="#">NM_001769</a>    | <a href="#">CD9</a>       | Homo sapiens CD9 molecule (CD9), mRNA.                                                                                                         | -2.94 | < 1e-07 |
| <a href="#">NM_144967</a>    | <a href="#">FLJ30058</a>  | Homo sapiens hypothetical protein FLJ30058 (FLJ30058), mRNA.                                                                                   | -2.13 | < 1e-07 |
| <a href="#">NM_004864</a>    | <a href="#">GDF15</a>     | Homo sapiens growth differentiation factor 15 (GDF15), mRNA.                                                                                   | 2.61  | < 1e-07 |
| <a href="#">NM_006017</a>    | <a href="#">PROM1</a>     | Homo sapiens prominin 1 (PROM1), mRNA.                                                                                                         | -2.21 | < 1e-07 |
| <a href="#">NM_183337</a>    | <a href="#">RGS11</a>     | Homo sapiens regulator of G-protein signaling 11 (RGS11), transcript variant 1, mRNA.                                                          | 4.30  | < 1e-07 |
| <a href="#">NM_000582</a>    | <a href="#">SPP1</a>      | Homo sapiens secreted phosphoprotein 1 (osteopontin, bone sialoprotein I, early T-lymphocyte activation 1) (SPP1), transcript variant 2, mRNA. | -2.22 | < 1e-07 |
| <a href="#">NM_002166</a>    | <a href="#">ID2</a>       | Homo sapiens inhibitor of DNA binding 2, dominant negative helix-loop-helix protein (ID2), mRNA.                                               | -2.81 | < 1e-07 |
| <a href="#">NR_002196</a>    | <a href="#">H19</a>       | Homo sapiens H19, imprinted maternally expressed transcript (H19) on chromosome 11.                                                            | -2.96 | < 1e-07 |
| <a href="#">NM_020975</a>    | <a href="#">RET</a>       | Homo sapiens ret proto-oncogene (RET), transcript variant 2, mRNA.                                                                             | -2.36 | < 1e-07 |
| <a href="#">XM_001132569</a> | <a href="#">LOC730130</a> | PREDICTED: Homo sapiens hypothetical protein LOC730130 (LOC730130), mRNA.                                                                      | -2.38 | < 1e-07 |
| <a href="#">NM_018027</a>    | <a href="#">FRMD4A</a>    | Homo sapiens FERM domain containing 4A (FRMD4A), mRNA.                                                                                         | 2.33  | < 1e-07 |

|                              |                          |                                                                                         |       |         |
|------------------------------|--------------------------|-----------------------------------------------------------------------------------------|-------|---------|
| <a href="#">NM_001458</a>    | <a href="#">FLNC</a>     | Homo sapiens filamin C, gamma (actin binding protein 280) (FLNC), mRNA.                 | 2.61  | < 1e-07 |
| <a href="#">NM_002930</a>    | <a href="#">RIT2</a>     | Homo sapiens Ras-like without CAAX 2 (RIT2), mRNA.                                      | 2.32  | < 1e-07 |
| <a href="#">NM_014220</a>    | <a href="#">TM4SF1</a>   | Homo sapiens transmembrane 4 L six family member 1 (TM4SF1), mRNA.                      | -2.15 | < 1e-07 |
| <a href="#">NM_207336</a>    | <a href="#">ZNF467</a>   | Homo sapiens zinc finger protein 467 (ZNF467), mRNA.                                    | 2.50  | < 1e-07 |
| <a href="#">NM_002224</a>    | <a href="#">ITPR3</a>    | Homo sapiens inositol 1,4,5-triphosphate receptor, type 3 (ITPR3), mRNA.                | 2.76  | < 1e-07 |
| <a href="#">NM_023940</a>    | <a href="#">RASL11B</a>  | Homo sapiens RAS-like, family 11, member B (RASL11B), mRNA.                             | -2.14 | < 1e-07 |
| <a href="#">NM_003619</a>    | <a href="#">PRSS12</a>   | Homo sapiens protease, serine, 12 (neurotrypsin, motopsin) (PRSS12), mRNA.              | -2.63 | < 1e-07 |
| <a href="#">NM_001613</a>    | <a href="#">ACTA2</a>    | Homo sapiens actin, alpha 2, smooth muscle, aorta (ACTA2), mRNA.                        | 2.59  | < 1e-07 |
| <a href="#">NM_020116</a>    | <a href="#">FSTL5</a>    | Homo sapiens follistatin-like 5 (FSTL5), mRNA.                                          | 2.41  | < 1e-07 |
| <a href="#">NM_002148</a>    | <a href="#">HOXD10</a>   | Homo sapiens homeobox D10 (HOXD10), mRNA.                                               | -1.89 | < 1e-07 |
| <a href="#">NM_018286</a>    | <a href="#">TMEM100</a>  | Homo sapiens transmembrane protein 100 (TMEM100), transcript variant 2, mRNA.           | -1.78 | < 1e-07 |
| <a href="#">XM_939093</a>    | <a href="#">FAM89A</a>   | PREDICTED: Homo sapiens family with sequence similarity 89, member A (FAM89A), mRNA.    | 1.88  | < 1e-07 |
| <a href="#">NM_022450</a>    | <a href="#">RHBDF1</a>   | Homo sapiens rhomboid 5 homolog 1 (Drosophila) (RHBDF1), mRNA.                          | 2.07  | < 1e-07 |
| <a href="#">NM_002334</a>    | <a href="#">LRP4</a>     | Homo sapiens low density lipoprotein receptor-related protein 4 (LRP4), mRNA.           | -1.85 | < 1e-07 |
| <a href="#">NM_000787</a>    | <a href="#">DBH</a>      | Homo sapiens dopamine beta-hydroxylase (dopamine beta-monooxygenase) (DBH), mRNA.       | -2.45 | < 1e-07 |
| <a href="#">NR_003512</a>    | <a href="#">INS-IGF2</a> | Homo sapiens INS-IGF2 (INS-IGF2), transcript variant 1, transcribed RNA.                | -2.17 | < 1e-07 |
| <a href="#">NM_001001995</a> | <a href="#">GPM6B</a>    | Homo sapiens glycoprotein M6B (GPM6B), transcript variant 1, mRNA.                      | -1.70 | < 1e-07 |
| <a href="#">NM_002737</a>    | <a href="#">PRKCA</a>    | Homo sapiens protein kinase C, alpha (PRKCA), mRNA.                                     | -1.89 | < 1e-07 |
| <a href="#">NM_020851</a>    | <a href="#">ISLR2</a>    | Homo sapiens immunoglobulin superfamily containing leucine-rich repeat 2 (ISLR2), mRNA. | -1.87 | < 1e-07 |
| <a href="#">NM_001915</a>    | <a href="#">CYB561</a>   | Homo sapiens cytochrome b-561 (CYB561), transcript variant 1, mRNA.                     | 1.52  | < 1e-07 |
| <a href="#">NM_006157</a>    | <a href="#">NELL1</a>    | Homo sapiens NEL-like 1 (chicken) (NELL1), mRNA.                                        | 1.44  | < 1e-07 |



|                     |                |                                                                                                              |       |           |
|---------------------|----------------|--------------------------------------------------------------------------------------------------------------|-------|-----------|
| <u>NM_002213</u>    | <u>ITGB5</u>   | Homo sapiens integrin, beta 5 (ITGB5), mRNA. XM_944688 XM_944693                                             | -1.38 | < 1e-07   |
| <u>NM_000685</u>    | <u>AGTR1</u>   | Homo sapiens angiotensin II receptor, type 1 (AGTR1), transcript variant 1, mRNA.                            | -1.34 | < 1e-07   |
| <u>NM_130467</u>    | <u>PAGE5</u>   | Homo sapiens P antigen family, member 5 (prostate associated) (PAGE5), transcript variant 1, mRNA.           | 1.36  | < 1e-07   |
| <u>NR_003655</u>    | <u>POLR2J4</u> | Homo sapiens polymerase (RNA) II (DNA directed) polypeptide J, 13.3kDa pseudogene (POLR2J4) on chromosome 7. | -2.86 | < 1e-07   |
| <u>NM_001001995</u> | <u>GPM6B</u>   | Homo sapiens glycoprotein M6B (GPM6B), transcript variant 1, mRNA.                                           | -1.31 | 1.00E-07  |
| <u>NM_001387</u>    | <u>DPYSL3</u>  | Homo sapiens dihydropyrimidinase-like 3 (DPYSL3), mRNA.                                                      | -1.33 | 1.00E-07  |
| <u>NM_005627</u>    | <u>SGK</u>     | Homo sapiens serum/glucocorticoid regulated kinase (SGK), mRNA.                                              | 1.27  | 1.00E-06  |
| <u>NM_003918</u>    | <u>GYG2</u>    | Homo sapiens glycogenin 2 (GYG2), transcript variant 2, mRNA.                                                | -1.24 | 6.70E-06  |
| <u>NM_002414</u>    | <u>CD99</u>    | Homo sapiens CD99 molecule (CD99), transcript variant 1, mRNA.                                               | -1.21 | 2.87E-05  |
| <u>NM_001475</u>    | <u>GAGE5</u>   | Homo sapiens G antigen 5 (GAGE5), mRNA.                                                                      | -1.14 | 0.0002161 |
| <u>NM_001475</u>    | <u>GAGE5</u>   | Homo sapiens G antigen 5 (GAGE5), mRNA.                                                                      | -1.15 | 0.0007225 |
| <u>NM_003053</u>    | <u>SLC18A1</u> | Homo sapiens solute carrier family 18 (vesicular monoamine), member 1 (SLC18A1), mRNA.                       | -1.18 | 0.0009372 |

**Supplementary Table 3:** C vs. D comparison identifying 112 transcripts differentially expressed between C and D groups on the univariate test ( $p < 0.001$ ). Sorted by  $p$ -value of the univariate test.

| RefSeq transcript ID         | Gene symbol              | Entrez Gene name                                                                                     | Fold-change | Parametric p-value |
|------------------------------|--------------------------|------------------------------------------------------------------------------------------------------|-------------|--------------------|
| <a href="#">NM_021048</a>    | <a href="#">MAGEA10</a>  | Homo sapiens melanoma antigen family A, 10 (MAGEA10), transcript variant 2, mRNA.                    | 15.05       | < 1e-07            |
| <a href="#">NM_130467</a>    | <a href="#">PAGE5</a>    | Homo sapiens P antigen family, member 5 (prostate associated) (PAGE5), transcript variant 1, mRNA.   | 11.92       | < 1e-07            |
| <a href="#">NM_144594</a>    | <a href="#">GTSF1</a>    | Homo sapiens gametocyte specific factor 1 (GTSF1), mRNA.                                             | 15.35       | < 1e-07            |
| <a href="#">NM_003598</a>    | <a href="#">TEAD2</a>    | Homo sapiens TEA domain family member 2 (TEAD2), mRNA.                                               | 6.74        | < 1e-07            |
| <a href="#">NM_000905</a>    | <a href="#">NPY</a>      | Homo sapiens neuropeptide Y (NPY), mRNA.                                                             | 15.57       | < 1e-07            |
| <a href="#">NM_002414</a>    | <a href="#">CD99</a>     | Homo sapiens CD99 molecule (CD99), transcript variant 1, mRNA.                                       | 10.41       | < 1e-07            |
| <a href="#">NM_001001995</a> | <a href="#">GPM6B</a>    | Homo sapiens glycoprotein M6B (GPM6B), transcript variant 1, mRNA.                                   | -3.73       | < 1e-07            |
| <a href="#">NM_032048</a>    | <a href="#">EMILIN2</a>  | Homo sapiens elastin microfibril interfacier 2 (EMILIN2), mRNA.                                      | 4.52        | < 1e-07            |
| <a href="#">NM_006157</a>    | <a href="#">NELL1</a>    | Homo sapiens NEL-like 1 (chicken) (NELL1), mRNA.                                                     | 3.43        | < 1e-07            |
| <a href="#">NM_174941</a>    | <a href="#">CD163L1</a>  | Homo sapiens CD163 molecule-like 1 (CD163L1), mRNA.                                                  | 4.07        | < 1e-07            |
| <a href="#">NM_002148</a>    | <a href="#">HOXD10</a>   | Homo sapiens homeobox D10 (HOXD10), mRNA.                                                            | -5.71       | < 1e-07            |
| <a href="#">NM_005519</a>    | <a href="#">HMX2</a>     | Homo sapiens H6 family homeobox 2 (HMX2), mRNA.                                                      | -4.28       | < 1e-07            |
| <a href="#">NM_194435</a>    | <a href="#">VIP</a>      | Homo sapiens vasoactive intestinal peptide (VIP), transcript variant 2, mRNA.                        | -5.24       | < 1e-07            |
| <a href="#">NM_001387</a>    | <a href="#">DPYSL3</a>   | Homo sapiens dihydropyrimidinase-like 3 (DPYSL3), mRNA.                                              | 3.14        | < 1e-07            |
| <a href="#">NM_207334</a>    | <a href="#">FAM43B</a>   | Homo sapiens family with sequence similarity 43, member B (FAM43B), mRNA.                            | 3.52        | < 1e-07            |
| <a href="#">NM_018027</a>    | <a href="#">FRMD4A</a>   | Homo sapiens FERM domain containing 4A (FRMD4A), mRNA.                                               | 3.28        | < 1e-07            |
| <a href="#">NM_018286</a>    | <a href="#">TMEM100</a>  | Homo sapiens transmembrane protein 100 (TMEM100), transcript variant 2, mRNA.                        | -2.89       | < 1e-07            |
| <a href="#">NR_002784</a>    | <a href="#">SMEK3P</a>   | Homo sapiens SMEK homolog 3, suppressor of mek1 (Dictyostelium) pseudogene (SMEK3P) on chromosome X. | 4.32        | < 1e-07            |
| <a href="#">NM_144967</a>    | <a href="#">FLJ30058</a> | Homo sapiens hypothetical protein FLJ30058 (FLJ30058), mRNA.                                         | 4.49        | < 1e-07            |
| <a href="#">NM_000685</a>    | <a href="#">AGTR1</a>    | Homo sapiens angiotensin II receptor, type 1 (AGTR1), transcript variant 1, mRNA.                    | 3.26        | < 1e-07            |
| <a href="#">NM_003918</a>    | <a href="#">GYG2</a>     | Homo sapiens glycogenin 2 (GYG2), transcript variant 2, mRNA.                                        | 3.05        | < 1e-07            |
| <a href="#">NM_005627</a>    | <a href="#">SGK</a>      | Homo sapiens serum/glucocorticoid regulated kinase (SGK), mRNA.                                      | 3.41        | < 1e-07            |

|                              |                          |                                                                                                                 |       |         |
|------------------------------|--------------------------|-----------------------------------------------------------------------------------------------------------------|-------|---------|
| <a href="#">XM_938742</a>    | <a href="#">SGPP2</a>    | PREDICTED: Homo sapiens sphingosine-1-phosphate phosphatase 2 (SGPP2), mRNA.                                    | -3.13 | < 1e-07 |
| <a href="#">NM_000624</a>    | <a href="#">SERPINA5</a> | Homo sapiens serpin peptidase inhibitor, clade A (alpha-1 antitrypsin, antitrypsin), member 5 (SERPINA5), mRNA. | 3.90  | < 1e-07 |
| <a href="#">NR_002196</a>    | <a href="#">H19</a>      | Homo sapiens H19, imprinted maternally expressed transcript (H19) on chromosome 11.                             | 3.17  | < 1e-07 |
| <a href="#">NM_001001995</a> | <a href="#">GPM6B</a>    | Homo sapiens glycoprotein M6B (GPM6B), transcript variant 1, mRNA.                                              | -3.49 | < 1e-07 |
| <a href="#">NM_001769</a>    | <a href="#">CD9</a>      | Homo sapiens CD9 molecule (CD9), mRNA.                                                                          | -4.09 | < 1e-07 |
| <a href="#">XM_001133042</a> | <a href="#">PDZRN3</a>   | PREDICTED: Homo sapiens PDZ domain containing RING finger 3 (PDZRN3), mRNA.                                     | -4.01 | < 1e-07 |
| <a href="#">NM_001031733</a> | <a href="#">CALML4</a>   | Homo sapiens calmodulin-like 4 (CALML4), transcript variant 2, mRNA.                                            | -2.14 | < 1e-07 |
| <a href="#">NM_003053</a>    | <a href="#">SLC18A1</a>  | Homo sapiens solute carrier family 18 (vesicular monoamine), member 1 (SLC18A1), mRNA.                          | 2.89  | < 1e-07 |
| <a href="#">NM_014141</a>    | <a href="#">CNTNAP2</a>  | Homo sapiens contactin associated protein-like 2 (CNTNAP2), mRNA.                                               | 2.38  | < 1e-07 |
| <a href="#">NM_001915</a>    | <a href="#">CYB561</a>   | Homo sapiens cytochrome b-561 (CYB561), transcript variant 1, mRNA.                                             | 2.83  | < 1e-07 |
| <a href="#">NM_001453</a>    | <a href="#">FOXC1</a>    | Homo sapiens forkhead box C1 (FOXC1), mRNA.                                                                     | -2.18 | < 1e-07 |
| <a href="#">NM_002942</a>    | <a href="#">ROBO2</a>    | Homo sapiens roundabout, axon guidance receptor, homolog 2 (Drosophila) (ROBO2), mRNA.                          | -5.85 | < 1e-07 |
| <a href="#">NM_001290</a>    | <a href="#">LDB2</a>     | Homo sapiens LIM domain binding 2 (LDB2), mRNA.                                                                 | 2.13  | < 1e-07 |
| <a href="#">NM_002213</a>    | <a href="#">ITGB5</a>    | Homo sapiens integrin, beta 5 (ITGB5), mRNA.<br>XM_944688 XM_944693                                             | 2.11  | < 1e-07 |
| <a href="#">NM_007115</a>    | <a href="#">TNFAIP6</a>  | Homo sapiens tumor necrosis factor, alpha-induced protein 6 (TNFAIP6), mRNA.                                    | -3.93 | < 1e-07 |
| <a href="#">NM_002166</a>    | <a href="#">ID2</a>      | Homo sapiens inhibitor of DNA binding 2, dominant negative helix-loop-helix protein (ID2), mRNA.                | 3.38  | < 1e-07 |
| <a href="#">NM_001458</a>    | <a href="#">FLNC</a>     | Homo sapiens filamin C, gamma (actin binding protein 280) (FLNC), mRNA.                                         | -2.87 | < 1e-07 |
| <a href="#">NM_020851</a>    | <a href="#">ISLR2</a>    | Homo sapiens immunoglobulin superfamily containing leucine-rich repeat 2 (ISLR2), mRNA.                         | 2.43  | < 1e-07 |
| <a href="#">NM_001476</a>    | <a href="#">GAGE6</a>    | Homo sapiens G antigen 6 (GAGE6), mRNA.                                                                         | -2.27 | < 1e-07 |
| <a href="#">XM_001133042</a> | <a href="#">PDZRN3</a>   | PREDICTED: Homo sapiens PDZ domain containing RING finger 3 (PDZRN3), mRNA.                                     | -4.50 | < 1e-07 |
| <a href="#">NM_002737</a>    | <a href="#">PRKCA</a>    | Homo sapiens protein kinase C, alpha (PRKCA), mRNA.                                                             | -2.89 | < 1e-07 |
| <a href="#">NM_139072</a>    | <a href="#">DNER</a>     | Homo sapiens delta/notch-like EGF repeat containing (DNER), mRNA.                                               | 2.40  | < 1e-07 |
| <a href="#">NM_001474</a>    | <a href="#">GAGE4</a>    | Homo sapiens G antigen 4 (GAGE4), mRNA.                                                                         | -2.40 | < 1e-07 |
| <a href="#">AB073882</a>     | <a href="#">Hs.1832</a>  | Homo sapiens primary neuroblastoma cDNA, clone:Nbla00830, full insert sequence                                  | 3.08  | < 1e-07 |
| <a href="#">NM_002334</a>    | <a href="#">LRP4</a>     | Homo sapiens low density lipoprotein receptor-related protein 4 (LRP4), mRNA.                                   | -2.21 | < 1e-07 |
| <a href="#">NM_006528</a>    | <a href="#">TFPI2</a>    | Homo sapiens tissue factor pathway inhibitor 2 (TFPI2), mRNA.                                                   | 3.32  | < 1e-07 |

|                              |                           |                                                                                                         |       |         |
|------------------------------|---------------------------|---------------------------------------------------------------------------------------------------------|-------|---------|
| <a href="#">NM_080760</a>    | <a href="#">DACH1</a>     | Homo sapiens dachshund homolog 1 (Drosophila) (DACH1), transcript variant 2, mRNA.                      | -2.38 | < 1e-07 |
| <a href="#">NM_001013653</a> | <a href="#">LRRC26</a>    | Homo sapiens leucine rich repeat containing 26 (LRRC26), mRNA.                                          | 2.46  | < 1e-07 |
| <a href="#">NM_001475</a>    | <a href="#">GAGE5</a>     | Homo sapiens G antigen 5 (GAGE5), mRNA.                                                                 | -2.34 | < 1e-07 |
| <a href="#">NM_013364</a>    | <a href="#">PNMA3</a>     | Homo sapiens paraneoplastic antigen MA3 (PNMA3), mRNA.                                                  | 2.55  | < 1e-07 |
| <a href="#">NR_003512</a>    | <a href="#">INS-IGF2</a>  | Homo sapiens INS-IGF2 (INS-IGF2), transcript variant 1, transcribed RNA.                                | 4.07  | < 1e-07 |
| <a href="#">NM_003020</a>    | <a href="#">SCG5</a>      | Homo sapiens secretogranin V (7B2 protein) (SCG5), mRNA.                                                | 1.99  | < 1e-07 |
| <a href="#">NM_012242</a>    | <a href="#">DKK1</a>      | Homo sapiens dickkopf homolog 1 (Xenopus laevis) (DKK1), mRNA.                                          | -2.01 | < 1e-07 |
| <a href="#">NM_033258</a>    | <a href="#">GNG8</a>      | Homo sapiens guanine nucleotide binding protein (G protein), gamma 8 (GNG8), mRNA.                      | -2.10 | < 1e-07 |
| <a href="#">NM_017637</a>    | <a href="#">BNC2</a>      | Homo sapiens basoonuclin 2 (BNC2), mRNA.                                                                | -2.03 | < 1e-07 |
| <a href="#">NM_001098409</a> | <a href="#">GAGE12G</a>   | Homo sapiens G antigen 12G (GAGE12G), mRNA.                                                             | -2.33 | < 1e-07 |
| <a href="#">NM_201630</a>    | <a href="#">LRRN2</a>     | Homo sapiens leucine rich repeat neuronal 2 (LRRN2), transcript variant 2, mRNA.                        | 1.95  | < 1e-07 |
| <a href="#">NM_004100</a>    | <a href="#">EYA4</a>      | Homo sapiens eyes absent homolog 4 (Drosophila) (EYA4), transcript variant 1, mRNA.                     | -1.81 | < 1e-07 |
| <a href="#">AK095715</a>     | <a href="#">Hs.155736</a> | Homo sapiens cDNA FLJ38396 fis, clone FEBRA2007957                                                      | 2.05  | < 1e-07 |
| <a href="#">NM_013322</a>    | <a href="#">SNX10</a>     | Homo sapiens sorting nexin 10 (SNX10), mRNA.                                                            | 1.95  | < 1e-07 |
| <a href="#">NM_024019</a>    | <a href="#">NEUROG2</a>   | Homo sapiens neurogenin 2 (NEUROG2), mRNA.                                                              | 2.37  | < 1e-07 |
| <a href="#">NM_001475</a>    | <a href="#">GAGE5</a>     | Homo sapiens G antigen 5 (GAGE5), mRNA.                                                                 | -2.34 | < 1e-07 |
| <a href="#">NM_001477</a>    | <a href="#">GAGE12I</a>   | Homo sapiens G antigen 12I (GAGE12I), mRNA.                                                             | -2.24 | < 1e-07 |
| <a href="#">NM_020826</a>    | <a href="#">SYT13</a>     | Homo sapiens synaptotagmin XIII (SYT13), mRNA.                                                          | 1.73  | < 1e-07 |
| <a href="#">NM_152330</a>    | <a href="#">FRMD6</a>     | Homo sapiens FERM domain containing 6 (FRMD6), transcript variant 2, mRNA.                              | -1.73 | < 1e-07 |
| <a href="#">NM_173662</a>    | <a href="#">RNF175</a>    | Homo sapiens ring finger protein 175 (RNF175), mRNA.                                                    | 1.92  | < 1e-07 |
| <a href="#">NM_001098411</a> | <a href="#">LOC645037</a> | Homo sapiens similar to GAGE-2 protein (G antigen 2) (LOC645037), mRNA.                                 | -2.17 | < 1e-07 |
| <a href="#">NM_001430</a>    | <a href="#">EPAS1</a>     | Homo sapiens endothelial PAS domain protein 1 (EPAS1), mRNA.                                            | 1.70  | < 1e-07 |
| <a href="#">NM_020975</a>    | <a href="#">RET</a>       | Homo sapiens ret proto-oncogene (RET), transcript variant 2, mRNA.                                      | -1.81 | < 1e-07 |
| <a href="#">NM_057159</a>    | <a href="#">LPAR1</a>     | Homo sapiens lysophosphatidic acid receptor 1 (LPAR1), transcript variant 2, mRNA.                      | -1.76 | < 1e-07 |
| <a href="#">NM_018962</a>    | <a href="#">DSCR6</a>     | Homo sapiens Down syndrome critical region gene 6 (DSCR6), mRNA.                                        | 1.56  | < 1e-07 |
| <a href="#">NM_001039582</a> | <a href="#">PNCK</a>      | Homo sapiens pregnancy upregulated non-ubiquitously expressed CaM kinase (PNCK), mRNA.                  | 1.62  | < 1e-07 |
| <a href="#">NM_182801</a>    | <a href="#">EGFLAM</a>    | Homo sapiens EGF-like, fibronectin type III and laminin G domains (EGFLAM), transcript variant 4, mRNA. | 1.55  | < 1e-07 |

|                     |                  |                                                                                                                              |       |          |
|---------------------|------------------|------------------------------------------------------------------------------------------------------------------------------|-------|----------|
| <u>NM_182898</u>    | <u>CREB5</u>     | Homo sapiens cAMP responsive element binding protein 5 (CREB5), transcript variant 1, mRNA.                                  | -2.05 | < 1e-07  |
| <u>BX537518</u>     | <u>Hs.7023</u>   | Homo sapiens mRNA; cDNA DKFZp686N1989 (from clone DKFZp686N1989)                                                             | 1.85  | < 1e-07  |
| <u>NM_002872</u>    | <u>RAC2</u>      | Homo sapiens ras-related C3 botulinum toxin substrate 2 (rho family, small GTP binding protein Rac2) (RAC2), mRNA.           | 1.43  | < 1e-07  |
| <u>NM_181876</u>    | <u>PPP2R2C</u>   | Homo sapiens protein phosphatase 2 (formerly 2A), regulatory subunit B, gamma isoform (PPP2R2C), transcript variant 2, mRNA. | 1.62  | < 1e-07  |
| <u>NM_001613</u>    | <u>ACTA2</u>     | Homo sapiens actin, alpha 2, smooth muscle, aorta (ACTA2), mRNA.                                                             | 1.59  | < 1e-07  |
| <u>NM_000419</u>    | <u>ITGA2B</u>    | Homo sapiens integrin, alpha 2b (platelet glycoprotein IIb of IIb/IIIa complex, antigen CD41) (ITGA2B), mRNA.                | -1.54 | < 1e-07  |
| <u>NM_000598</u>    | <u>IGFBP3</u>    | Homo sapiens insulin-like growth factor binding protein 3 (IGFBP3), transcript variant 2, mRNA.                              | 1.43  | 1.00E-07 |
| <u>NM_003283</u>    | <u>TNNT1</u>     | Homo sapiens troponin T type 1 (skeletal, slow) (TNNT1), mRNA.                                                               | 1.72  | 1.00E-07 |
| <u>NM_014817</u>    | <u>KIAA0644</u>  | Homo sapiens KIAA0644 gene product (KIAA0644), mRNA.                                                                         | -1.45 | 1.00E-07 |
| <u>XM_001132569</u> | <u>LOC730130</u> | PREDICTED: Homo sapiens hypothetical protein LOC730130 (LOC730130), mRNA.                                                    | 1.39  | 1.00E-07 |
| <u>NM_080415</u>    | <u>4-Sep</u>     | Homo sapiens septin 4 (SEPT4), transcript variant 2, mRNA.                                                                   | -1.47 | 2.00E-07 |
| <u>NM_001946</u>    | <u>DUSP6</u>     | Homo sapiens dual specificity phosphatase 6 (DUSP6), transcript variant 1, mRNA.                                             | -1.43 | 2.00E-07 |
| <u>CD678339</u>     | <u>Hs.489857</u> | hp06b06.y1 Human Trabecular meshwork cDNA: hohphq Homo sapiens cDNA clone hp06b06 5, mRNA sequence                           | 1.38  | 2.00E-07 |
| <u>NM_080390</u>    | <u>TCEAL2</u>    | Homo sapiens transcription elongation factor A (SII)-like 2 (TCEAL2), mRNA.                                                  | 1.38  | 5.00E-07 |
| <u>NM_002224</u>    | <u>ITPR3</u>     | Homo sapiens inositol 1,4,5-triphosphate receptor, type 3 (ITPR3), mRNA.                                                     | -1.57 | 6.00E-07 |
| <u>NM_145764</u>    | <u>MGST1</u>     | Homo sapiens microsomal glutathione S-transferase 1 (MGST1), transcript variant 1d, mRNA.                                    | 1.48  | 6.00E-07 |
| <u>NM_003619</u>    | <u>PRSS12</u>    | Homo sapiens protease, serine, 12 (neurotrypsin, motopsin) (PRSS12), mRNA.                                                   | -1.41 | 7.00E-07 |
| <u>NM_000728</u>    | <u>CALCB</u>     | Homo sapiens calcitonin-related polypeptide beta (CALCB), mRNA.                                                              | -1.49 | 7.00E-07 |
| <u>NR_003655</u>    | <u>POLR2J4</u>   | Homo sapiens polymerase (RNA) II (DNA directed) polypeptide J, 13.3kDa pseudogene (POLR2J4) on chromosome 7.                 | 3.12  | 2.00E-06 |
| <u>NM_020630</u>    | <u>RET</u>       | Homo sapiens ret proto-oncogene (RET), transcript variant 4, mRNA.                                                           | -1.20 | 2.40E-06 |
| <u>NM_007374</u>    | <u>SIX6</u>      | Homo sapiens SIX homeobox 6 (SIX6), mRNA.                                                                                    | 1.39  | 5.40E-06 |
| <u>NM_020775</u>    | <u>KIAA1324</u>  | Homo sapiens KIAA1324 (KIAA1324), mRNA.                                                                                      | 1.30  | 1.81E-05 |
| <u>NM_181676</u>    | <u>PPP2R2B</u>   | Homo sapiens protein phosphatase 2 (formerly 2A), regulatory subunit B, beta isoform (PPP2R2B), transcript variant 4, mRNA.  | 1.29  | 1.93E-05 |

|                  |                 |                                                                                                |       |           |
|------------------|-----------------|------------------------------------------------------------------------------------------------|-------|-----------|
| <u>NM_181689</u> | <u>NNAT</u>     | Homo sapiens neuronatin (NNAT), transcript variant 2, mRNA.                                    | 1.24  | 1.98E-05  |
| <u>NM_018354</u> | <u>C20orf46</u> | Homo sapiens chromosome 20 open reading frame 46 (C20orf46), mRNA.                             | -1.30 | 2.11E-05  |
| <u>NM_032594</u> | <u>INSM2</u>    | Homo sapiens insulinoma-associated 2 (INSM2), mRNA.                                            | 1.27  | 2.92E-05  |
| <u>BX100246</u>  | <u>Hs.38132</u> | BX100246 Soares fetal liver spleen 1NFLS Homo sapiens cDNA clone IMAGp998N04398, mRNA sequence | -1.28 | 3.15E-05  |
| <u>NM_032229</u> | <u>SLITRK6</u>  | Homo sapiens SLIT and NTRK-like family, member 6 (SLITRK6), mRNA.                              | 1.34  | 6.57E-05  |
| <u>NM_002345</u> | <u>LUM</u>      | Homo sapiens lumican (LUM), mRNA.                                                              | -1.27 | 6.91E-05  |
| <u>NM_005386</u> | <u>NNAT</u>     | Homo sapiens neuronatin (NNAT), transcript variant 1, mRNA.                                    | 1.32  | 7.79E-05  |
| <u>NM_174947</u> | <u>C19orf30</u> | Homo sapiens chromosome 19 open reading frame 30 (C19orf30), mRNA.                             | -1.33 | 0.0001026 |
| <u>NM_033504</u> | <u>TMEM54</u>   | Homo sapiens transmembrane protein 54 (TMEM54), mRNA.                                          | -1.29 | 0.0001243 |
| <u>NM_006017</u> | <u>PROM1</u>    | Homo sapiens prominin 1 (PROM1), mRNA.                                                         | -1.24 | 0.0001516 |
| <u>NM_000787</u> | <u>DBH</u>      | Homo sapiens dopamine beta-hydroxylase (dopamine beta-monoxygenase) (DBH), mRNA.               | 1.42  | 0.000189  |
| <u>NM_032808</u> | <u>LINGO1</u>   | Homo sapiens leucine rich repeat and Ig domain containing 1 (LINGO1), mRNA.                    | -1.19 | 0.0002893 |
| <u>NM_020975</u> | <u>RET</u>      | Homo sapiens ret proto-oncogene (RET), transcript variant 2, mRNA.                             | -1.43 | 0.000377  |
| <u>XM_939093</u> | <u>FAM89A</u>   | PREDICTED: Homo sapiens family with sequence similarity 89, member A (FAM89A), mRNA.           | 1.31  | 0.0004038 |
